# Supplementary material for: Colorless polyimides derived from adamantane-containing diamines
Source: Royal Society of Chemistry journal article supplement (doi:10.1039/d0py01016b), 2020-01-01
Supplement: d0py01016b1.pdf [file d0py01016b1.pdf]

## Supporting Information

# Colorless Polyimides Derived from Adamantane- containing Diamines

Jie Miao<sup>1,2</sup>, Xiaofan Hu<sup>3</sup>, Xiangwei Wang<sup>3</sup>, Xiangsheng Meng<sup>3\*</sup>, Zhen Wang<sup>2,3\*</sup>, Jingling Yan<sup>1,3\*</sup>

<sup>1</sup> Changchun Institute of Applied Chemistry, Chinese Academy of Science, Changchun, 130022, China

<sup>2</sup> College of Applied chemistry and Engineering, University of Science and Technology of China, Hefei, 230026, China

<sup>3</sup> Ningbo Institute of Industrial Technology, Chinese Academy of Science, Ningbo, 315201, China

\* Corresponding author: Xiangsheng Meng, E-mail: [mengxiangsheng@nimte.ac.cn](mailto:mengxiangsheng@nimte.ac.cn); Zhen Wang, Email: [wz@nimte.ac.cn](mailto:wz@nimte.ac.cn); Jingling Yan, Email: [jyan@nimte.ac.cn](mailto:jyan@nimte.ac.cn).

### List of Contents for Supplementary Materials:

---

Figure S1. <sup>13</sup>C NMR spectra of of ADMDA

Figure S2. <sup>13</sup>C NMR spectra of of DMADMDA

Figure S3. <sup>19</sup>F NMR spectra of FADMDA

Figure S4. GC-MS chromatogram of FADMDA

Figure S5. Representative FT-IR spectra of the adamantane-containing polyimides

Figure S6. Representative <sup>1</sup>H NMR spectra of the adamantane-containing polyimides

Figure S7. WAXD patterns of the adamantane-containing polyimides

Figure S8. Representative DSC curves of the adamantane-containing polyimides

Figure S9. TGA curves of the adamantane-containing polyimides

Figure S10. DMA curves of the adamantane-containing polyimides

Figure S11. UV-Vis spectra of the adamantane-containing polyimides

Table S1. Inherent viscosities, molecular weights, and solubility of the adamantane-containing polyimides

Table S2. Optical properties of the adamantane-containing polyimides

---

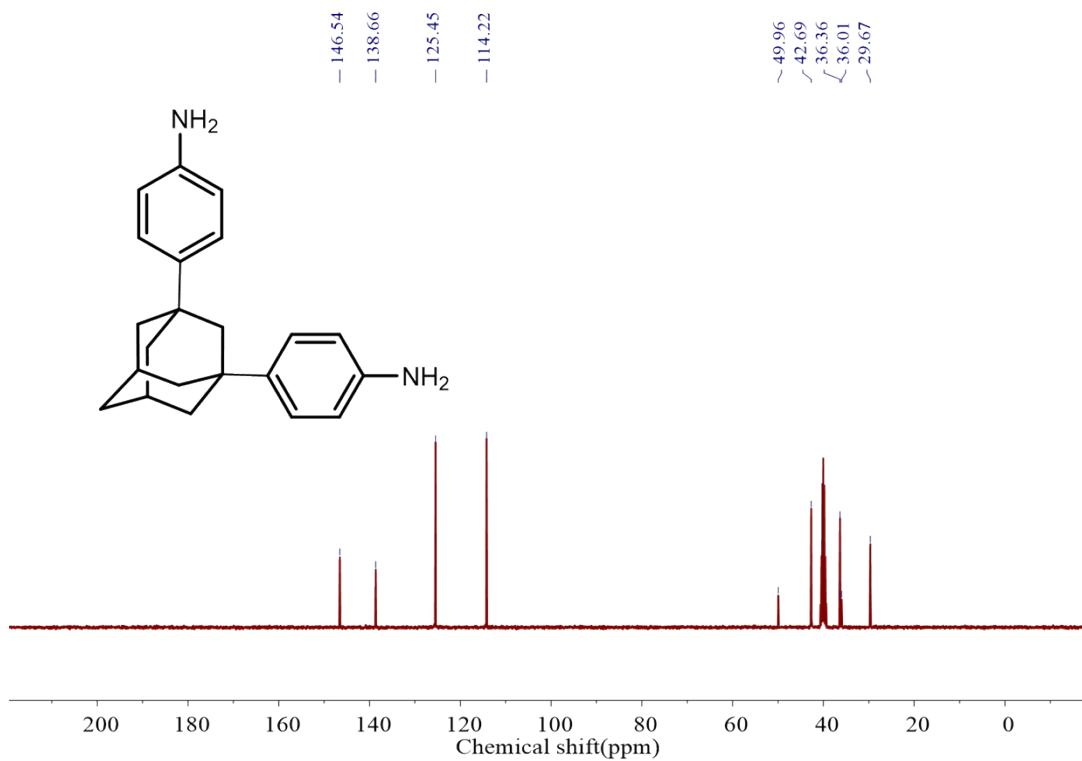

Figure S1. <sup>13</sup>C NMR spectra of ADMDA

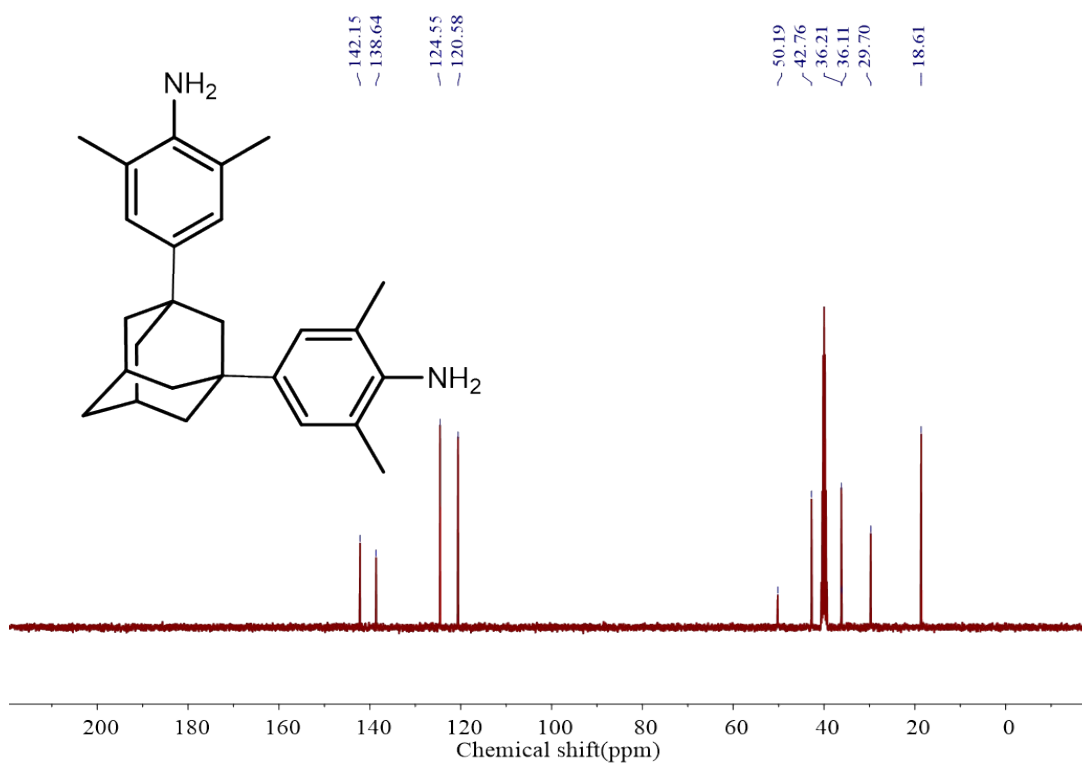

Figure S2. <sup>13</sup>C NMR spectra of DMADMDA

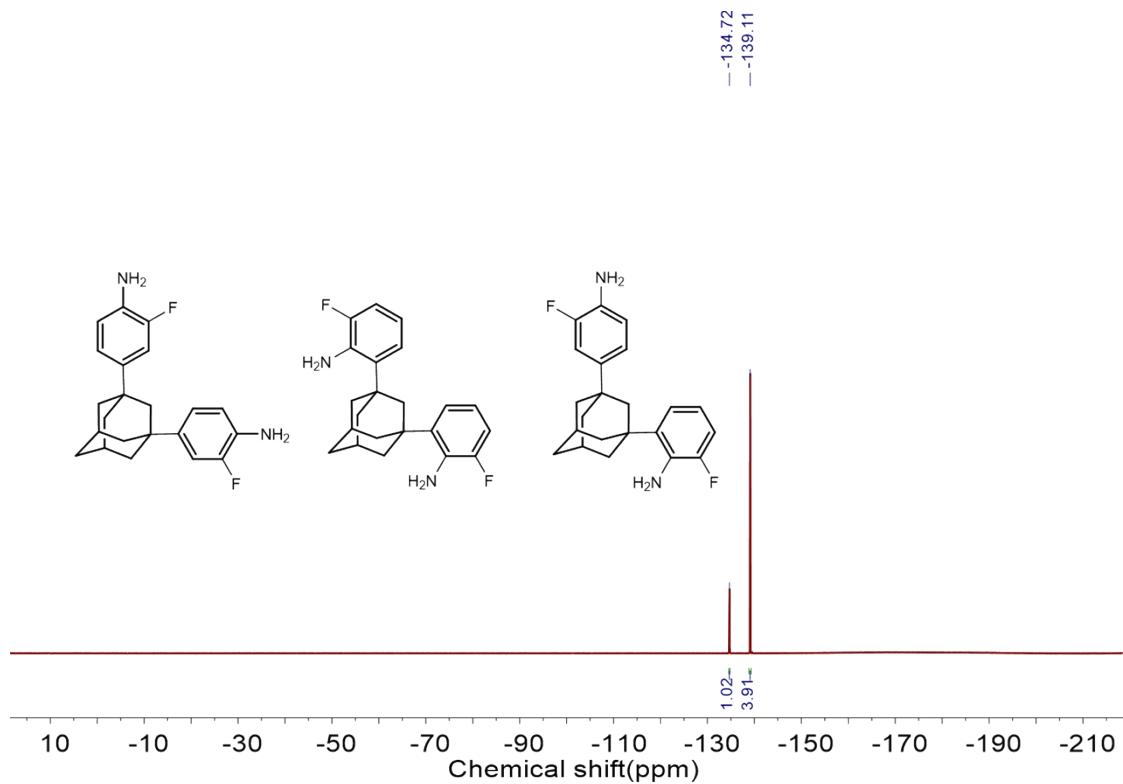

Figure S3.  $^{19}\text{F}$  NMR spectra of FADMDA

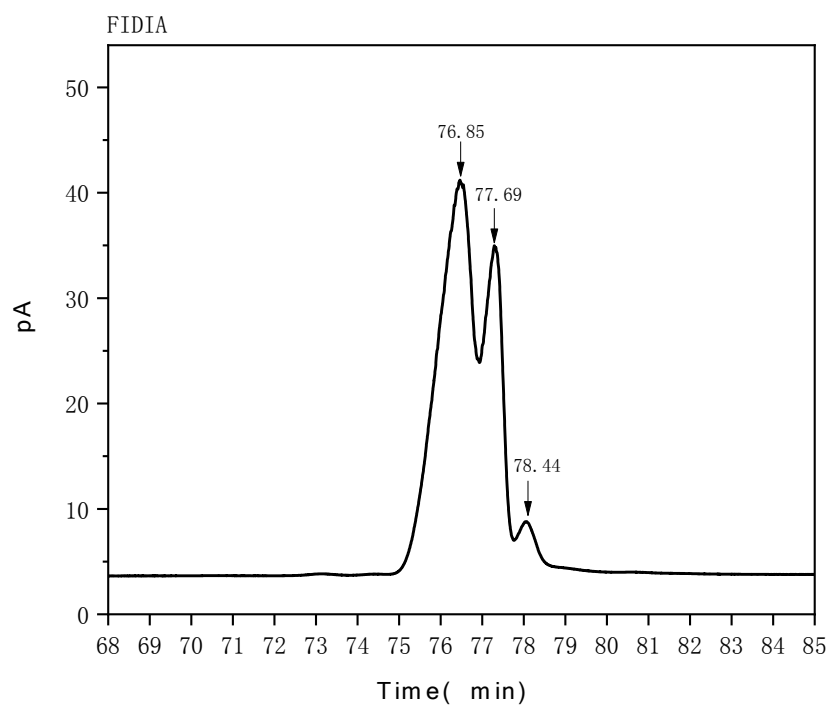

Figure S4. GC-MS chromatogram of FADMDA

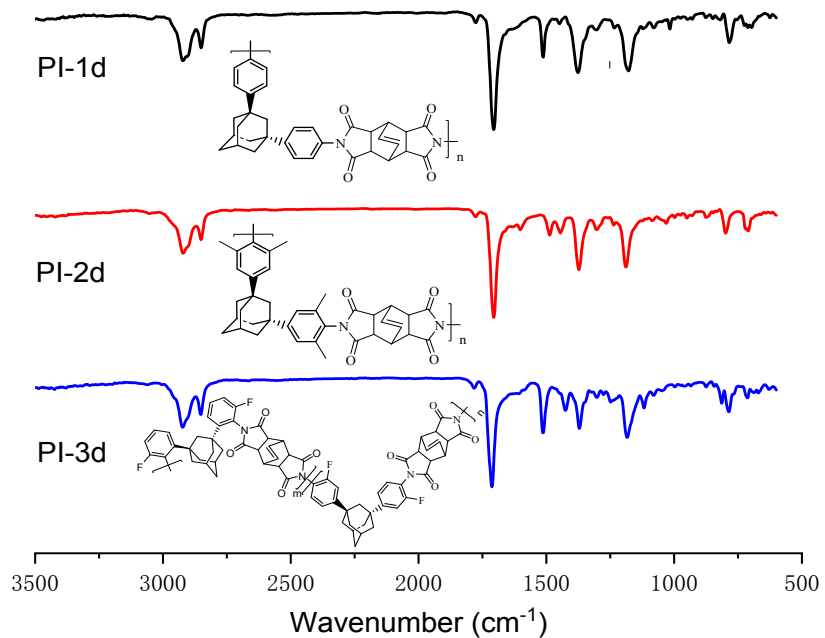

Figure S5. Representative FT-IR spectra of the adamantane-containing polyimides

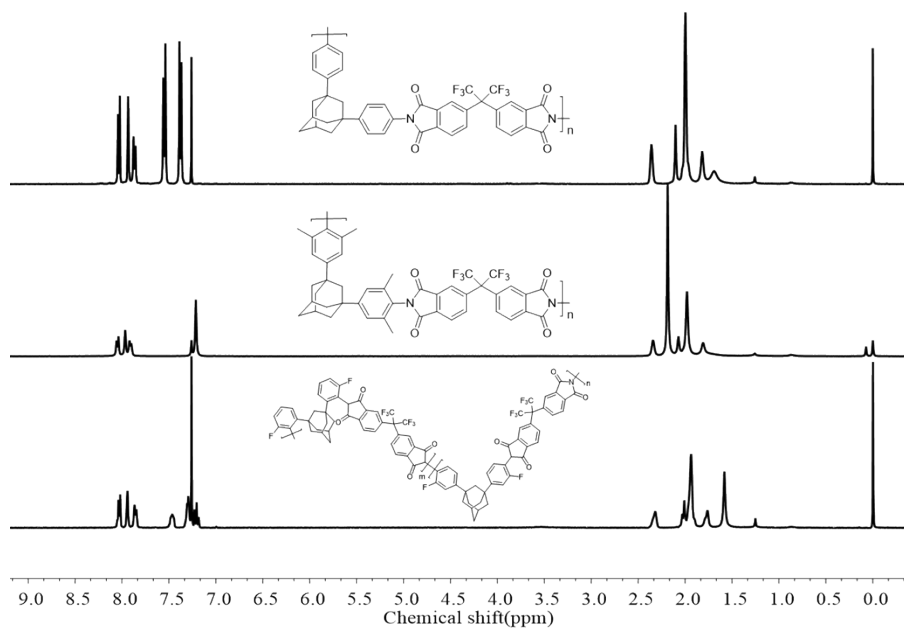

Figure S6. Representative  $^1\text{H}$  NMR spectra of the adamantane-containing polyimides

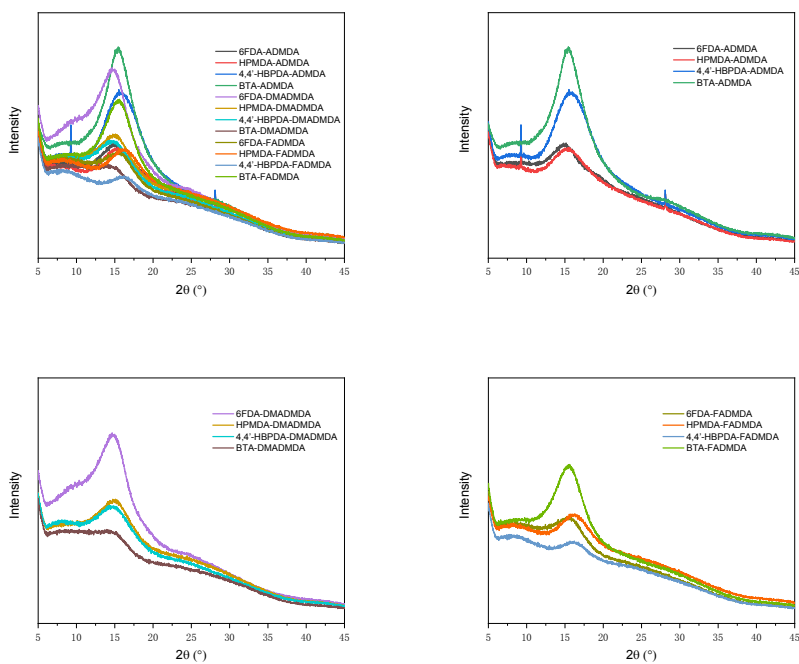

Figure S7. WAXD patterns of the adamantane-containing polyimides

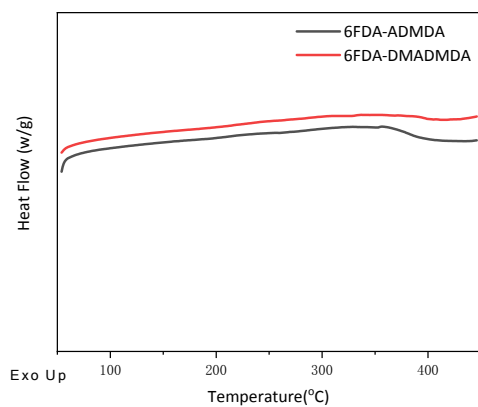

Figure S8. Representative DSC curves of the adamantane-containing polyimides

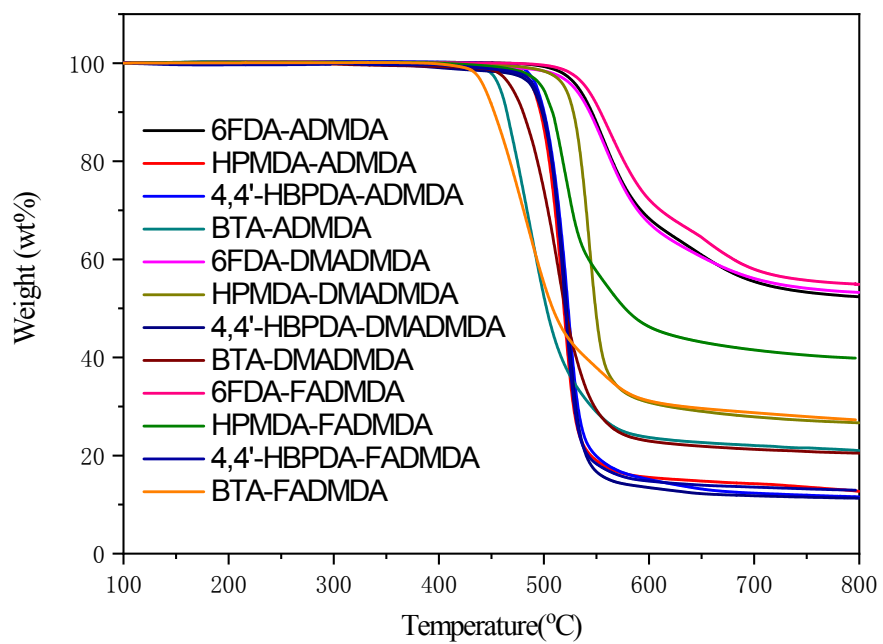

Figure S9. TGA curves of the adamantane-containing polyimides

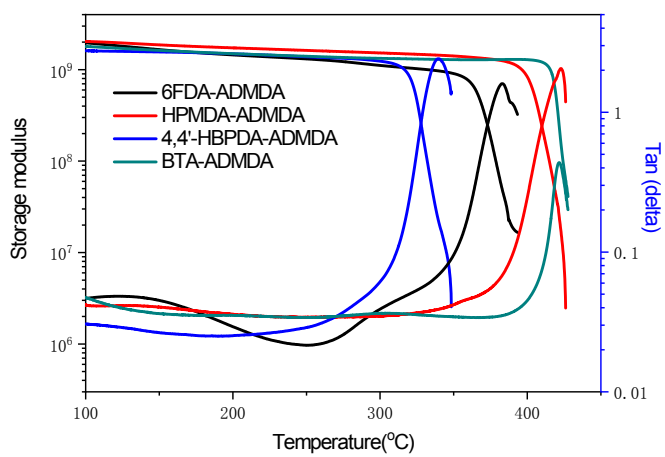

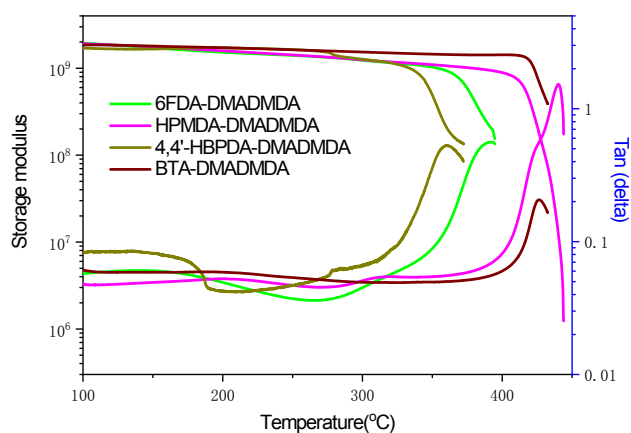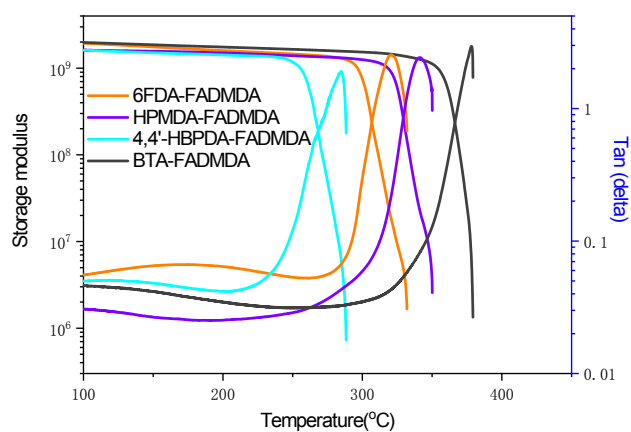

Figure S10. DMTA curves of the adamantane-containing polyimides

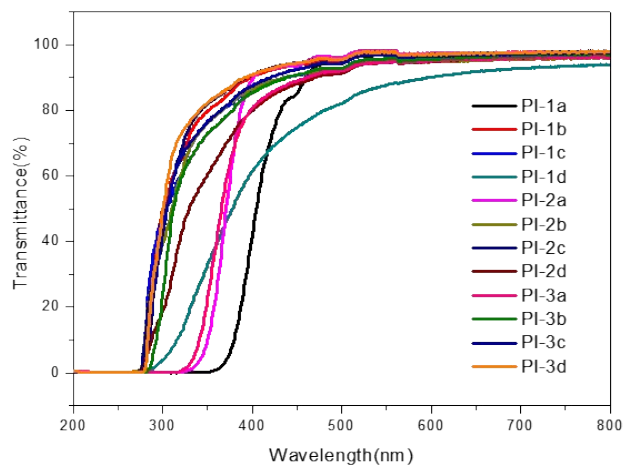

Figure S11. UV-Vis spectra of the adamantane-containing polyimides

Table S1. Inherent viscosities, molecular weights, and solubility of the adamantane-containing polyimides

| Polyimides         | $M_w$<br>(kg mol <sup>-1</sup> ) | PDI | $\eta_{inh}^a$<br>(dL g <sup>-1</sup> ) | Solubility       |     |      |     |                   |     |
|--------------------|----------------------------------|-----|-----------------------------------------|------------------|-----|------|-----|-------------------|-----|
|                    |                                  |     |                                         | <i>m</i> -Cresol | DMF | DMAc | NMP | CHCl <sub>3</sub> | THF |
| 6FDA-ADMDA         | 122                              | 2.5 | 0.84                                    | +                | +   | +    | +   | +                 | +   |
| HPMDA-ADMDA        | 106                              | 2.3 | 0.77                                    | +                | +   | +    | +   | +                 | +/- |
| 4,4'-HBPDA-ADMDA   | 110                              | 2.1 | 0.80                                    | +                | +   | +    | +   | +/-               | -   |
| BTA-ADMDA          | -                                | -   | 2.16                                    | +                | +/- | +/-  | +   | +/-               | -   |
| 6FDA-DMADMDA       | 186                              | 2.4 | 1.12                                    | +                | +   | +    | +   | +                 | +/- |
| HPMDA-DMADMDA      | 124                              | 2.2 | 0.85                                    | +                | +   | +    | +   | +                 | +/- |
| 4,4'-HBPDA-DMADMDA | 96                               | 2.0 | 0.70                                    | +                | +   | +    | +   | +                 | +/- |
| BTA-DMADMDA        | -                                | -   | 1.98                                    | +                | +/- | +/-  | +   | +/-               | -   |
| 6FDA-FADMDA        | 116                              | 2.3 | 0.82                                    | +                | +   | +    | +   | +                 | +/- |
| HPMDA-FADMDA       | 104                              | 2.0 | 0.75                                    | +                | +   | +    | +   | +                 | +/- |
| 4,4'-HBPDA-FADMDA  | 97                               | 2.1 | 0.73                                    | +                | +   | +    | +   | +                 | +/- |
| BTA-FADMDA         | -                                | -   | 2.04                                    | +                | +/- | +/-  | +   | +/-               | +/- |

<sup>a</sup>: Determined at a concentration of 0.5 g dL<sup>-1</sup> in *m*-Cresol at 30 °C. +: Soluble at room temperature, +/-: Partially soluble or swelling.

Table S2. Optical properties of the adamantane-containing polyimides<sup>a</sup>.

| Polyimides         | $\lambda_{cutoff}$ (nm) | $T_{400}$ (%) | lightness (L*) | Yellowness (b*) | redness (a*) | YI E313 |
|--------------------|-------------------------|---------------|----------------|-----------------|--------------|---------|
| 6FDA-ADMDA         | 361                     | 42            | 95.40          | 5.09            | -1.69        | 8.33    |
| HPMDA-ADMDA        | 276                     | 90            | 95.20          | 1.98            | -0.11        | 3.72    |
| 4,4'-HBPDA-ADMDA   | 275                     | 86            | 94.60          | 3.82            | -0.28        | 6.85    |
| BTA-ADMDA          | 282                     | 80            | 95.38          | 2.19            | -0.24        | 4.04    |
| 6FDA-DMADMDA       | 331                     | 89            | 95.85          | 2.11            | -0.46        | 3.65    |
| HPMDA-DMADMDA      | 275                     | 86            | 94.19          | 2.31            | -0.17        | 4.33    |
| 4,4'-HBPDA-DMADMDA | 276                     | 91            | 95.90          | 1.07            | -0.05        | 1.99    |
| BTA-DMADMDA        | 279                     | 80            | 95.02          | 3.23            | -0.24        | 5.96    |
| 6FDA-FADMDA        | 323                     | 81            | 95.20          | 3.55            | -0.37        | 6.44    |
| HPMDA-FADMDA       | 284                     | 86            | 95.01          | 2.61            | -0.09        | 4.90    |
| 4,4'-HBPDA-FADMDA  | 279                     | 88            | 94.66          | 3.93            | -0.31        | 7.22    |
| BTA-FADMDA         | 280                     | 91            | 95.43          | 2.41            | -0.19        | 4.43    |

<sup>a</sup> The color parameters were calculated according to a CIE LAB equation, the film thickness was around 20-40  $\mu$ m. YI means Yellowness Index; L\* refers to lightness; 100 means white, while 0 indicates black. A positive a\* means red color, a negative a\* indicates green color. A positive b\* means yellow color, a negative b\* indicates blue color.  $T_{400}$ (%) means transmittance at 400 nm.
